# Supplementary material for: Comparison of gingiva‐derived and bone marrow mesenchymal stem cells for osteogenesis
Source: PubMed Central journal article supplement (PMC6815943; doi:10.1111/jcmm.14632), 2019-09-10
Supplement: JCMM-23-7592-s001.pdf [file JCMM-23-7592-s001.pdf]

## Supporting Information Tables

Table 1. Plate document/experiment parameters for TaqMan® Pri-miRNA Assays.

| System                                            | Run      | Reaction plate   | Plate document/experiment parameters      | Thermal cycling conditions |            |              |
|---------------------------------------------------|----------|------------------|-------------------------------------------|----------------------------|------------|--------------|
|                                                   |          |                  |                                           | Stage                      | Temp ( °C) | Time (mm:ss) |
| Applied Biosystems 7300/7500 Real-Time PCR System | Standard | 96-well standard | Rxn. Volume: 20 µL<br>Ramp Rate: Standard | Hold                       | 50         | 2:00         |
|                                                   |          |                  |                                           | Hold                       | 95         | 10:00        |
|                                                   |          |                  |                                           | Cycle (40 Cycles)          | 95         | 0:15         |
|                                                   |          |                  |                                           |                            | 60         | 1:00         |

Table 2. Primer sequences.

| Gene  | Forward primer (5'→3')   | Reverse primer (5'→3') |
|-------|--------------------------|------------------------|
| ALP   | CTTCATAAGCAGGCGGGGG      | TGCCGATGGCCAGTACTAAA   |
| OCN   | GCAATAAGGTAGTGAACAGACTCC | GTTTGTAGGCGGTCTTCAAGC  |
| OSX   | CCCACCTAACAGGAGGATTT     | CACTGGAATGGAGTGAAACC   |
| RUNX2 | GAGGGGGAAATGCCAAATAA     | TGCTATTGCCCAAGATTTGC   |
| GAPDH | CCACCCAGAAGACTGTGGAT     | CACATTGGGGGTAGGAACAC   |

OCN, osteocalcin; OSX, osterix; Runx2, runt-related transcription factor 2.
